# Supplementary material for: Micro-array based on parafilm towards the opto-analysis of Cu(ii), Cr(vi), and Ni(ii) ions in fish samples by specific indicators: a state-of-the-art approach
Source: Royal Society of Chemistry journal article supplement (doi:10.1039/d5ra09860b), 2026-03-30
Supplement: d5ra09860b2.pdf [file d5ra09860b2.pdf]

## Supporting information

### **Microreactor assembled on parafilm towards opto-analysis of Cu(II), Cr(VI), and Ni(II) ions in fish samples by specific indicators**

Farnaz Bahavarnia <sup>a</sup>, Houman Kholafazad Kordasht <sup>b</sup>, Mohammad Hasanzadeh <sup>c,\*</sup>, Nasrin  
Shadjou <sup>d</sup>

<sup>a</sup> Asian Nano-Ink Co., Tabriz University of Medical Sciences, Tabriz, Iran.

<sup>b</sup> Pharmaceutical Analysis Research Center, Tabriz University of Medical Sciences,  
Tabriz, Iran.

<sup>c</sup> Nutrition Research Center, Tabriz University of Medical Sciences, Tabriz, Iran.

<sup>d</sup> Department of Nanotechnology, Faculty of Chemistry, Urmia University, Urmia,  
Iran.

#### **Corresponding Author**

\* (Mohammad Hasanzadeh) Pharmaceutical Analysis Research Center, Tabriz University of  
Medical Sciences, Tabriz, Iran.

E-mail address: (\*) [hasanzadehm@tbzmed.ac.ir](mailto:hasanzadehm@tbzmed.ac.ir);

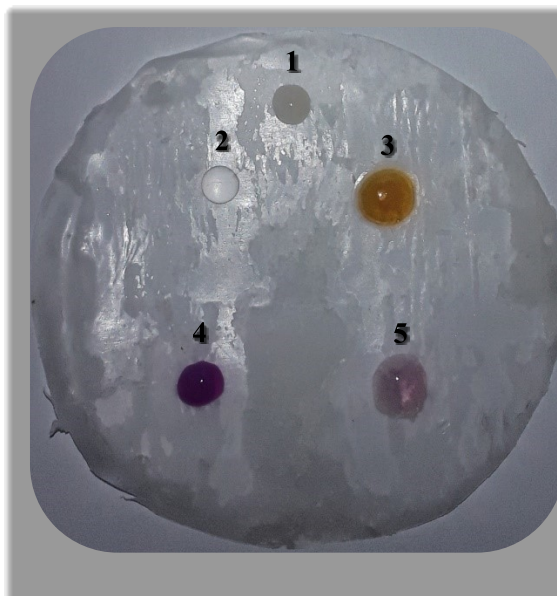

**Fig. S1.** Photographs of modified PCMA with (1) fish meat, (2) H<sub>2</sub>O, (3) HA/Neocuproine/Cu(II), (4) diphenyl carbazide/H<sub>2</sub>SO<sub>4</sub>/Cr(VI), (5) dimethylglyoxime/Ethanol/NaF/Na<sub>2</sub>S<sub>2</sub>O<sub>3</sub>/Ni(II).

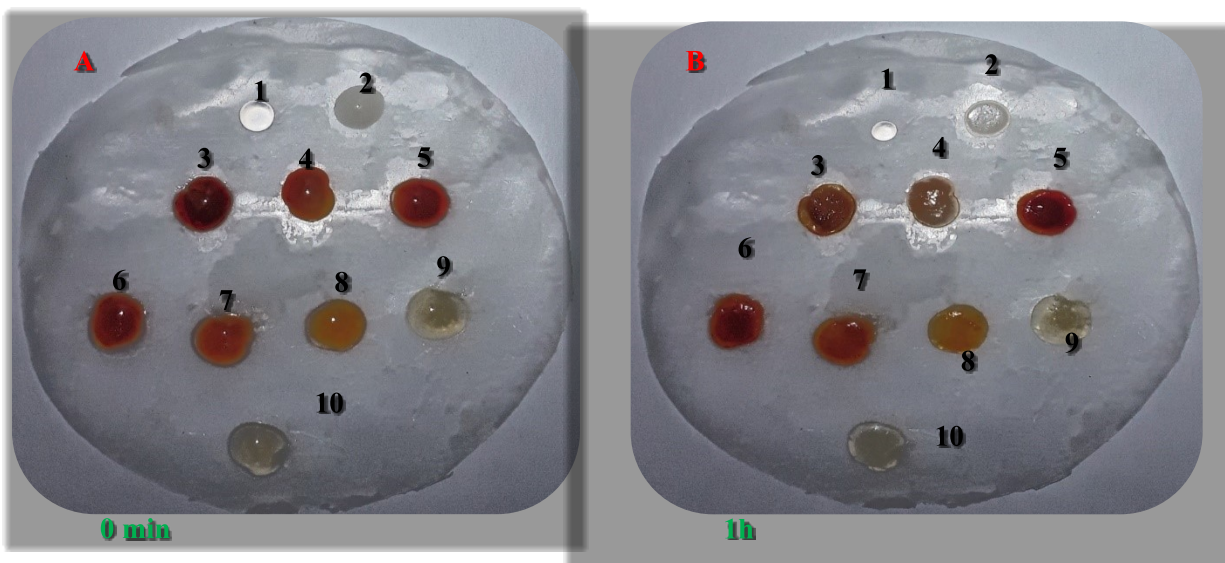

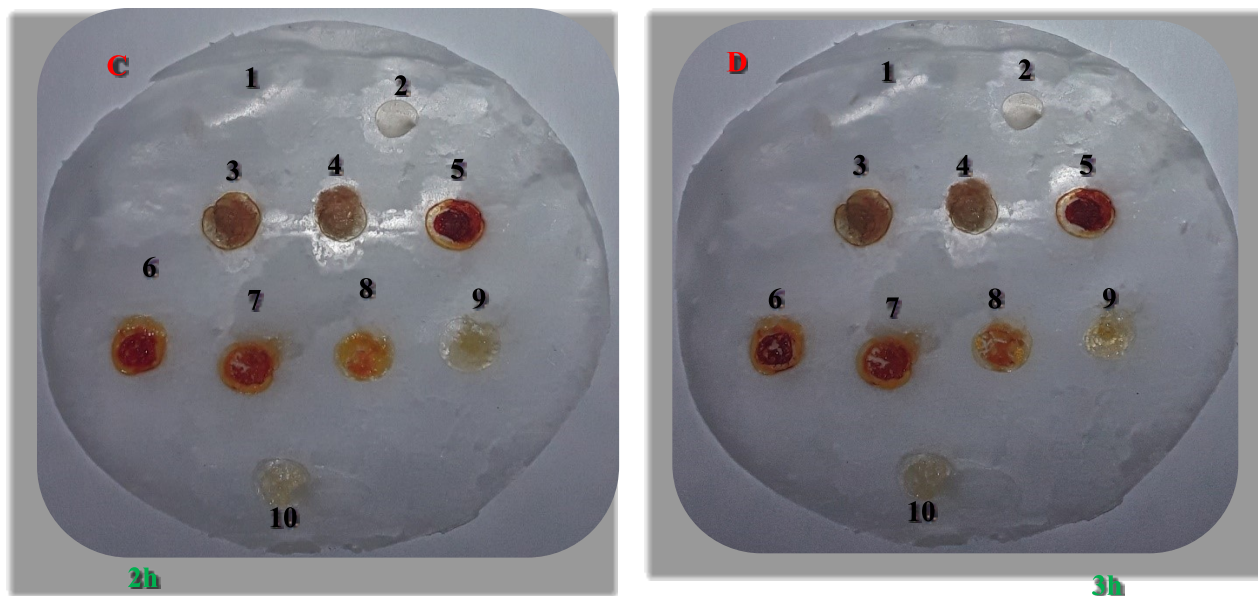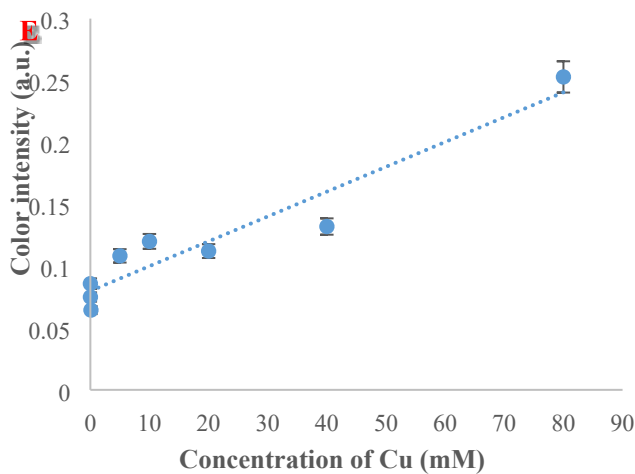

**Fig. S2. (A-D).** Photographs of the modified PCMA at four incubation times, including 0, 60, 120, and 180 minutes, with (1) H<sub>2</sub>O, (2) fish meat, and (3–10) fish meat/HA/Acetic acid buffer/Neocuproine/Chloroform/Cu(II) at concentrations of 0.005, 0.01, 0.1, 5, 10, 20, 40, and 80 mM. **(E)** Calibration curves (n=3, SD=2.046±0.2).

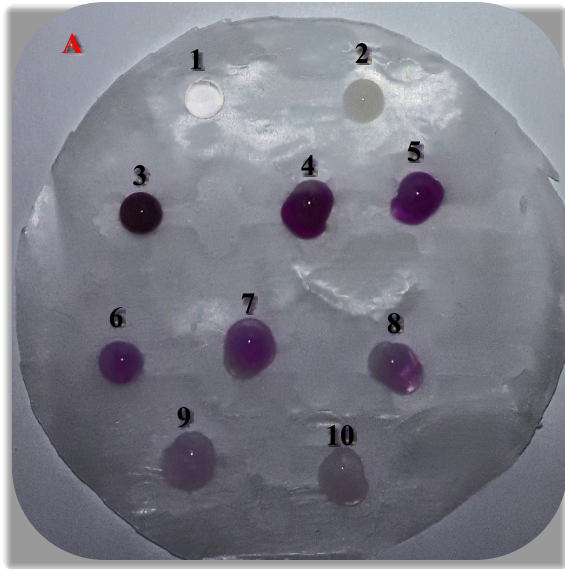

0 min

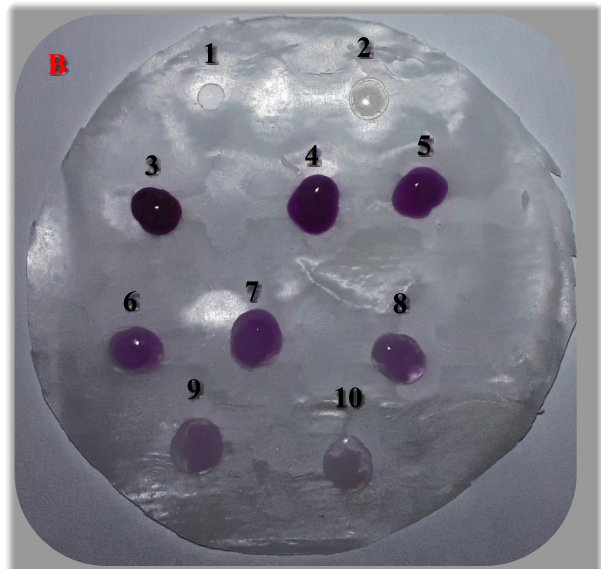

1h

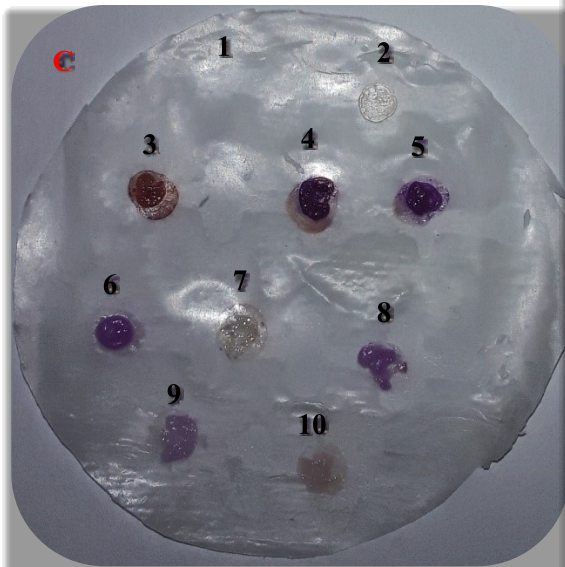

2h

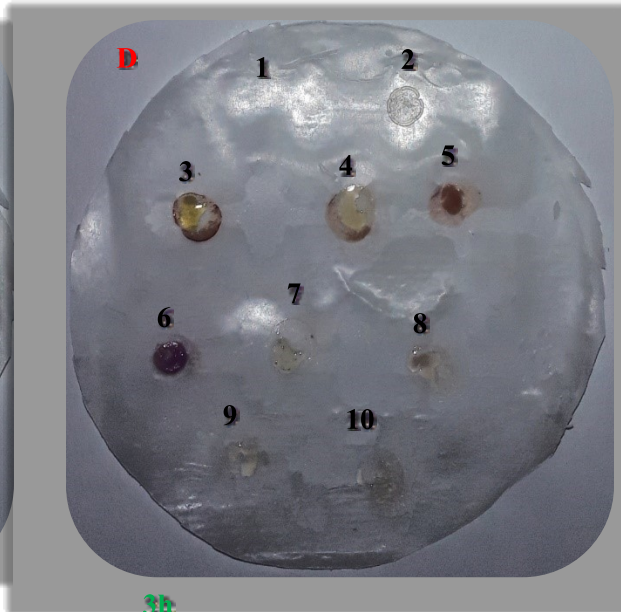

3h

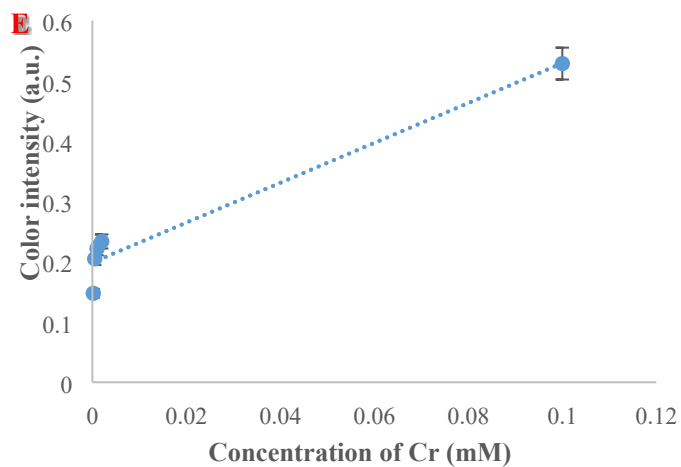

**Fig. S3 (A-D).** Photographs of the modified PCMA at four incubation times, including 0, 60, 120, and 180 minutes, with **(1)** H<sub>2</sub>O, **(2)** fish meat, and **(3–10)** fish meat/Diphenyl carbazide/Acetone/H<sub>2</sub>SO<sub>4</sub>/Cr(VI) at concentrations of 0.0002, 0.0005, 0.001, 0.002, and 0.1 mM. **(E).** Calibration curves. (n=3, SD=2.063±0.2).

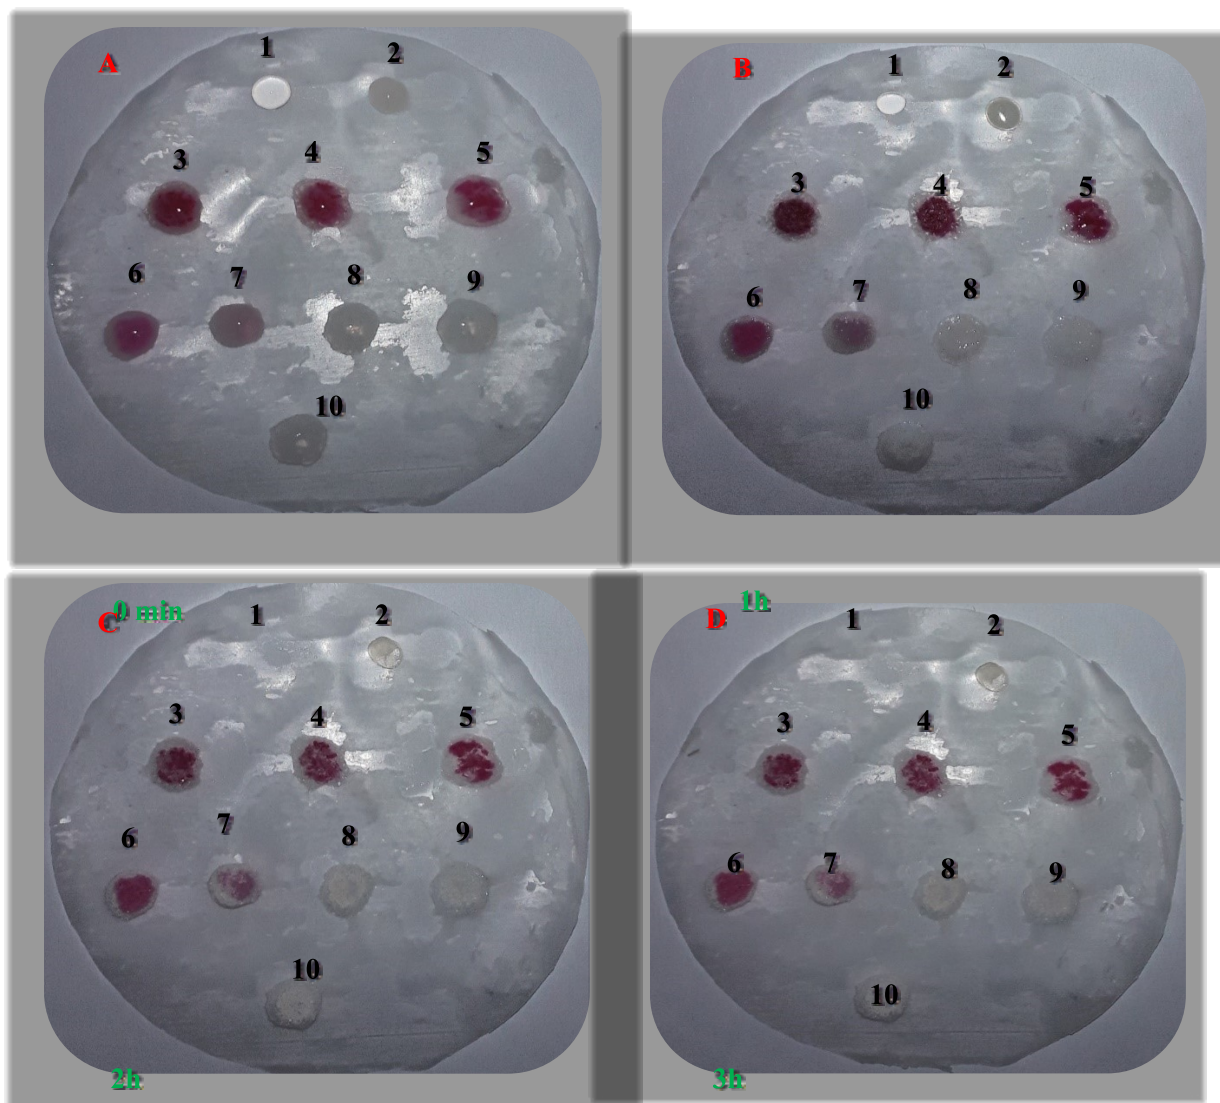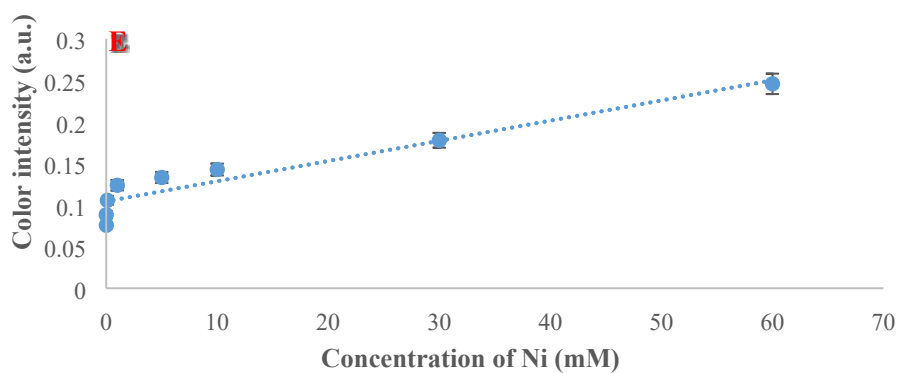

**Fig. S4. (A-D).** Photographs of the modified PCMA at four incubation times, including 0, 60, 120, and 180 minutes, with **(1)** H<sub>2</sub>O, **(2)** fish meat, and **(3-10)** fish meat/Dimethylglyoxime/Ethanol/NaF/Na<sub>2</sub>S<sub>2</sub>O<sub>3</sub>/Ni(II) at concentrations of 0.002 0.01, 0.1, 1, 5, 15, and 30 mM. **(E)** Calibration curves. (n=3, SD=1.79±0.2).

**Table S1.** Analytical summary of colorimetric data and detection sensitivity our study for detecting candidate metal ions.

| Fig | Item | RGB code    | ~ Color name       | Barcode | $\lambda$ (nm) | LLOQ      |
|-----|------|-------------|--------------------|---------|----------------|-----------|
| 5 A | 1    | 229,245,247 | Cool Minit         | #E5F5F7 | 547            | 5 $\mu$ M |
|     | 2    | 230,187,66  | Meat Brown         | #E6BB42 | 588            |           |
|     | 3    | 214,187,66  | Old Gold           | #D6BB42 | 591            |           |
|     | 4    | 225,161,62  | Mari Gold          | #E1A13E | 592            |           |
|     | 5    | 234,178,61  | Xanthous           | #EAB23D | 594            |           |
|     | 6    | 191,123,22  | Mustard Brown      | #BF7B16 | 594            |           |
|     | 7    | 226,162,41  | Mari Gold          | #E2A229 | 592            |           |
|     | 8    | 199,199,174 | Dark Beige         | #CVCVAE | 575            |           |
|     | 9    | 162,153,154 | Spanish Gray       | #A2999A | 572            |           |
| 5 B | 1    | 182,187,190 | Medium Gray        | #B6BBBE | 483            | 3nM       |
|     | 2    | 31,12,21    | Black Purple       | #1F0C15 | 453            |           |
|     | 3    | 39,16,37    | Dark Purple        | #271025 | 453            |           |
|     | 4    | 29,0,30     | Black Purple       | #1D001E | 453            |           |
|     | 5    | 62,23,76    | Russian Violet     | #3E174C | 456            |           |
|     | 6    | 50,30,68    | Russian Violet     | #320344 | 458            |           |
|     | 7    | 77,45,94    | Old Heliotrope     | #4D2D5E | 460            |           |
|     | 8    | 84,60,96    | Old Heliotrope     | #543C60 | 462            |           |
|     | 9    | 111,99,121  | Old Lavender       | #6F6379 | 462            |           |
| 5 C | 1    | 247,254,255 | Neon Withe         | #F7FEFF | 481            | 0.1mM     |
|     | 2    | 142,22,59   | Clart              | #8E163B | 466            |           |
|     | 3    | 156,41,88   | Jazzberry Jam      | #9C2958 | 463            |           |
|     | 4    | 155,66,122  | Maximum Red purple | #9B427A | 477            |           |
|     | 5    | 157,132,161 | Glossy Grape       | #9DA4A1 | 473            |           |
|     | 6    | 156,159,175 | Manatee            | #9C9FAF | 456            |           |
|     | 7    | 172,181,192 | Zinc               | #ACB6C0 | 456            |           |
|     | 8    | 146,153,163 | Gadet Gray         | #9299A3 | 453            |           |
|     | 9    | 152,161,170 | Gadet Gray         | #98A1AA | 453a           |           |
